# Supplementary material for: Utility of Scanning Electron Microscopy Elemental Analysis Using the ‘NanoSuit’ Correlative Light and Electron Microscopy Method in the Diagnosis of Lanthanum Phosphate Deposition in the Esophagogastroduodenal Mucosa
Source: PubMed Central journal article supplement (PMC7167806; doi:10.3390/diagnostics10010001), 2019-12-18
Supplement: diagnostics-10-00001-s001.pdf [file diagnostics-10-00001-s001.pdf]

# Supplementary Material

**Supplementary Table S1.** List of weight percentage (wt%) of elements detected by SEM-EDS analysis using the NanoSuit-CLEM method.

| Case | Organ <sup>1</sup> | Location <sup>2</sup> | Element <sup>3</sup> |      |      |      |      |     |     |      |      |      |
|------|--------------------|-----------------------|----------------------|------|------|------|------|-----|-----|------|------|------|
|      |                    |                       | La                   | P    | C    | O    | Si   | Ca  | Na  | Br   | S    | Al   |
| No.1 | St                 | B                     | 43.3                 | 10.8 | <0.1 | 29.6 | 7.6  | 2.3 | 2.3 | 1.5  | 0.6  | <0.1 |
|      |                    | D                     | <0.1                 | 0.2  | 46.9 | 20.5 | 21.7 | 4.3 | 3.5 | <0.1 | 0.2  | 0.7  |
| No.2 | St                 | B                     | 27.0                 | 6.4  | 24.5 | 30.0 | 7.6  | 1.9 | 1.7 | <0.1 | <0.1 | 0.5  |
|      |                    | D                     | <0.1                 | 0.4  | 62.1 | 22.0 | 9.7  | 1.9 | 1.7 | 0.9  | 0.3  | <0.1 |
| No.2 | Du                 | B                     | 24.0                 | 5.4  | 32.0 | 29.4 | 5.5  | 1.5 | 1.4 | <0.1 | 0.2  | 0.4  |
|      |                    | D                     | <0.1                 | <0.1 | 67.2 | 14.9 | 12.3 | 2.5 | 1.4 | 0.7  | <0.1 | <0.1 |
| No.3 | St                 | B                     | 45.1                 | 10.5 | <0.1 | 26.5 | 9.2  | 2.8 | 2.5 | <0.1 | 1.1  | 1.2  |
|      |                    | D                     | <0.1                 | 0.3  | 65.3 | 22.4 | 7.5  | 1.3 | 1.3 | 0.8  | 0.4  | <0.1 |
| No.3 | Du                 | B                     | 14.4                 | 3.5  | 40.7 | 23.3 | 10.7 | 2.2 | 2.2 | <0.1 | 0.4  | 0.7  |
|      |                    | D                     | <0.1                 | 0.1  | 57.6 | 19.7 | 13.9 | 2.6 | 2.7 | <0.1 | 0.3  | 0.6  |
| No.4 | Du                 | B                     | 22.0                 | 6.0  | 32.3 | 27.6 | 6.9  | 2.1 | 1.5 | 1.3  | <0.1 | <0.1 |
|      |                    | D                     | <0.1                 | 0.3  | 59.9 | 16.3 | 15.7 | 3.5 | 1.8 | <0.1 | 0.5  | 0.6  |
| No.5 | Du                 | B                     | 30.2                 | 7.6  | 21.5 | 27.3 | 7.3  | 2.4 | 1.9 | 1.3  | 0.3  | <0.1 |
|      |                    | D                     | <0.1                 | 0.4  | 65.6 | 19.9 | 8.7  | 1.6 | 1.7 | <0.1 | 0.6  | 0.5  |
| No.6 | St                 | B                     | 30.4                 | 6.1  | 36.1 | 19.7 | 4.0  | 1.5 | 1.0 | <0.1 | 0.5  | 0.5  |
|      |                    | D                     | <0.1                 | 0.3  | 57.5 | 28.2 | 8.4  | 1.4 | 2.2 | 0.7  | 0.4  | <0.1 |
| No.6 | Es                 | B                     | 31.9                 | 7.6  | 24.0 | 25.5 | 5.8  | 1.9 | 1.5 | 1.3  | 0.2  | <0.1 |
|      |                    | D                     | <0.1                 | 0.2  | 60.7 | 14.8 | 15.7 | 3.5 | 1.8 | <0.1 | 0.3  | 0.6  |

<sup>1</sup> St, stomach; Du, duodenum; Es, esophagus. <sup>2</sup> B, bright area; D, background at other dimmer area. <sup>3</sup> If wt%  $\geq 1.0\%$  was detected in at least one measurement, the element is listed in this table.

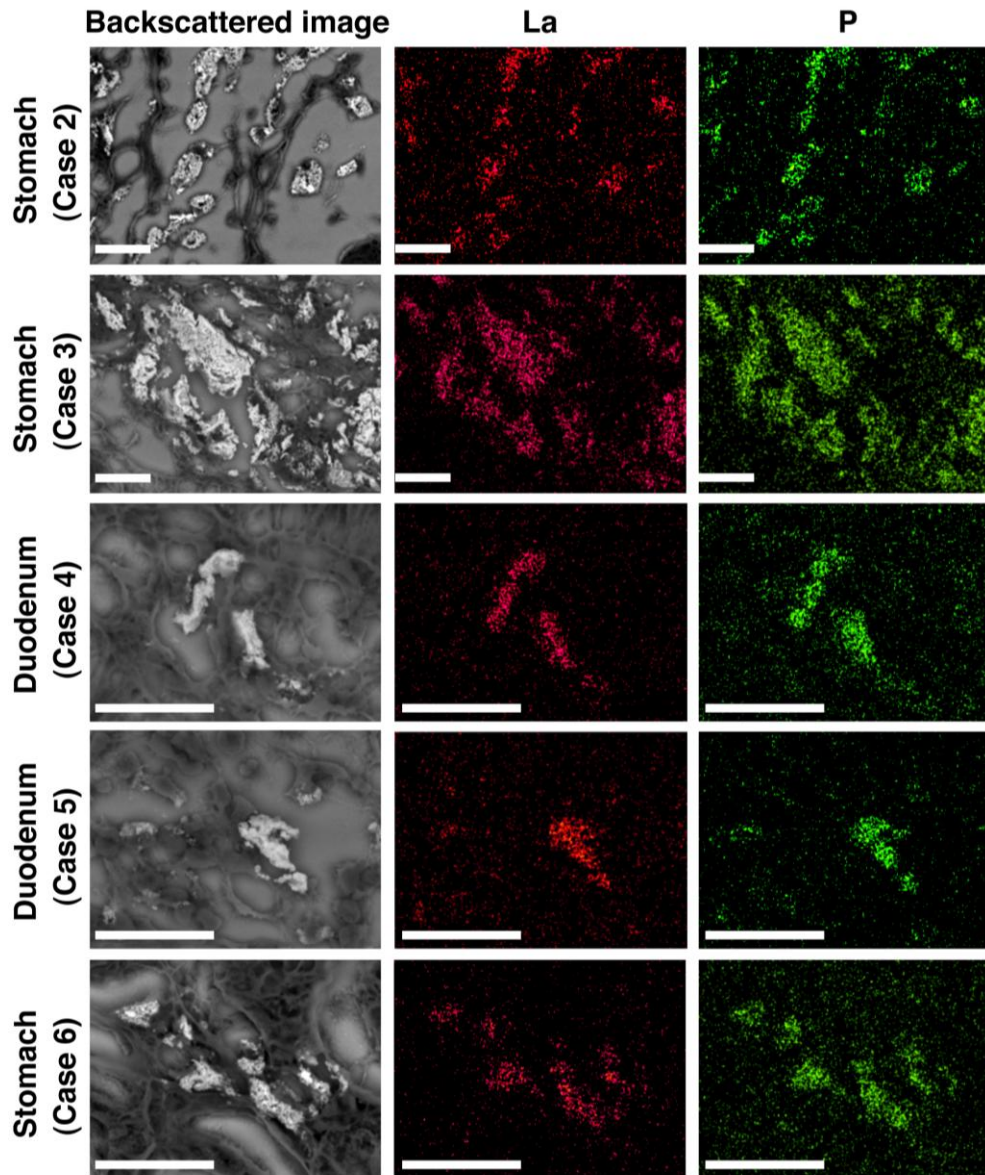

**Supplementary Figure S1.** The other results detecting lanthanum phosphate deposition in the gastroduodenal mucosa by SEM-EDS analysis using the NanoSuit-CLEM method (cases 2–6). The results other than the results shown in Figure 2 are shown in this figure. Images in the left column are backscattered SEM images showing a bright area in the mucosa. The middle- and right-column images are elemental mapping images using SEM-EDS analysis showing deposition of lanthanum (La) and phosphorus (P), respectively. Scale bar = 25  $\mu$ m.

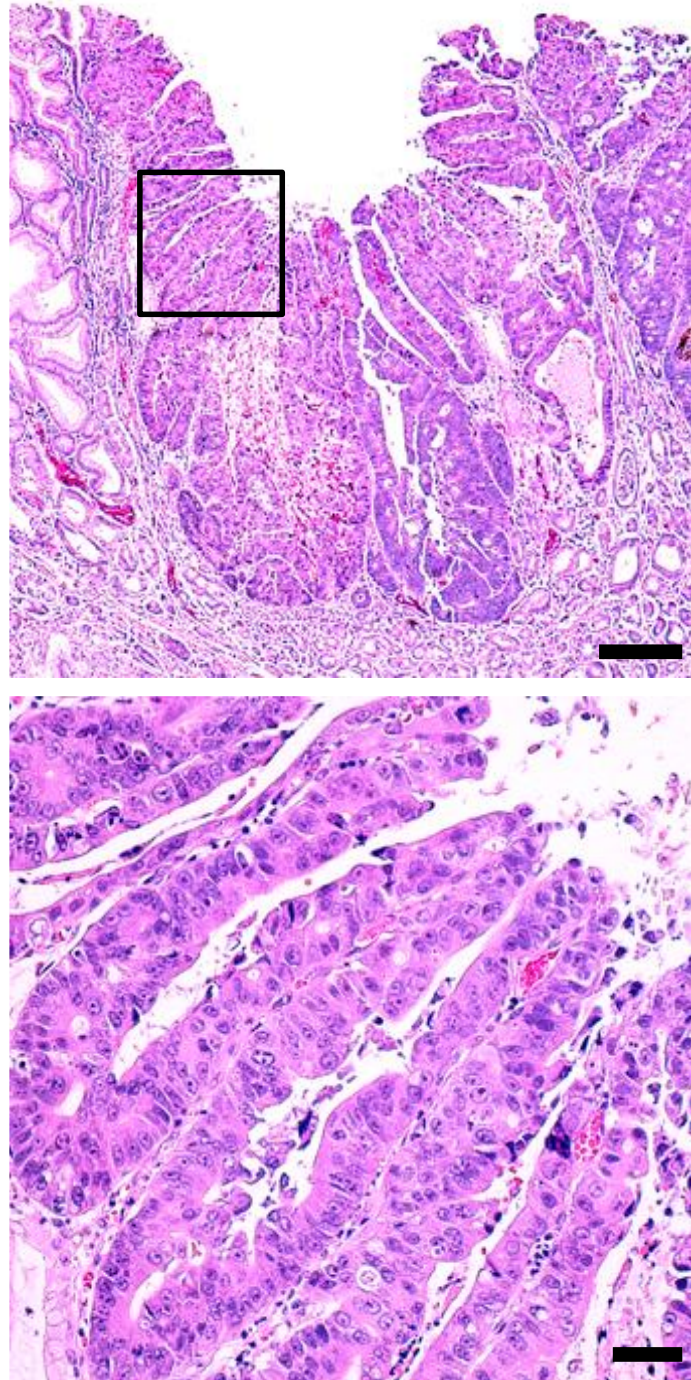

**Supplementary Figure S2.** Images by light microscopy of H&E-stained primary adenocarcinoma in the stomach containing lanthanum phosphate deposition (case 6). Image in the lower panel is a higher magnification of the boxed area in the image in the upper panel. Scale bar = 200  $\mu$ m (upper); 40  $\mu$ m (lower)..

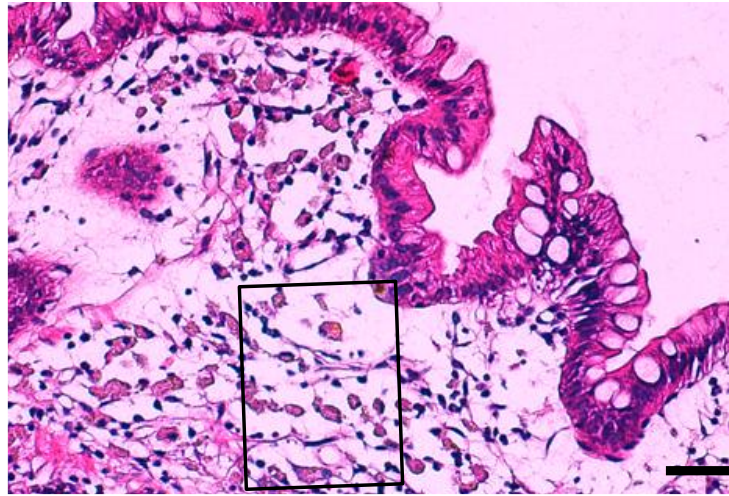

**Supplementary Figure S3.** Another representative result of re-staining with H&E after SEM observation (case 2, stomach). Boxed area is the area used for elemental mapping analysis based on SEM-EDS using the NanoSuit-CLEM method. Scale bar = 50  $\mu$ m.
